# Supplementary material for: Metal–organic frameworks with oxazoline-containing tripodal ligand: structure changes via reaction medium and metal-to-ligand ratio
Source: Royal Society of Chemistry journal article supplement (doi:10.1039/c002874f), 2010-01-01
Supplement: c002874f.pdf [file c002874f.pdf]

## Supplementary Information

### Metal-organic frameworks with oxazoline-containing tripodal ligand: structure changes *via* reaction medium and metal-to-ligand ratio

Yong-Qing Huang,<sup>a,b</sup> Zhong-Liang Shen,<sup>a</sup> Xia-Ying Zhou,<sup>a</sup> Taka-aki Okamura,<sup>c</sup> Zhi Su,<sup>a</sup> Jian Fan,<sup>a</sup> Wei-Yin Sun,<sup>\*a</sup> Jin-Quan Yu<sup>\*d</sup> and Norikazu Ueyama<sup>c</sup>

<sup>a</sup> Coordination Chemistry Institute, State Key Laboratory of Coordination Chemistry, School of Chemistry and Chemical Engineering, Nanjing National Laboratory of Microstructure, Nanjing University, Nanjing 210093, China. E-mail address: [sunwy@nju.edu.cn](mailto:sunwy@nju.edu.cn)

<sup>b</sup> Department of Applied Chemistry, College of Chemical and Environmental Engineering, Shandong University of Science and Technology, Qingdao 266510, China

<sup>c</sup> Department of Macromolecular Science, Graduate School of Science, Osaka University, Toyonaka, Osaka 560-0043, Japan

<sup>d</sup> Department of Chemistry, The Scripps Research Institute, La Jolla, CA 92037, USA

**Table S1** Distances [Å] and angles [°] of hydrogen bonding for complexes **1-6**<sup>a</sup>

| D-H...A <sup>b</sup>               | Distance<br>(D...A <sup>b</sup> ) | D-H-A <sup>b</sup>               | Angle<br>(D-H-A <sup>b</sup> ) |
|------------------------------------|-----------------------------------|----------------------------------|--------------------------------|
| <b>1</b>                           |                                   |                                  |                                |
| C(8)-H(8A)...O(1W)                 | 3.345(12)                         | C(8)-H(8A)-O(1W)                 | 135                            |
| C(9)-H(9B)...O(15) <sup>#1</sup>   | 3.428(11)                         | C(9)-H(9B)-O(15) <sup>#1</sup>   | 156                            |
| C(15)-H(15B)...O(25) <sup>#2</sup> | 3.378(15)                         | C(15)-H(15B)-O(25) <sup>#2</sup> | 142                            |
| C(23)-H(23B)...O(14) <sup>#1</sup> | 3.367(11)                         | C(23)-H(23B)-O(14) <sup>#1</sup> | 156                            |
| C(27)-H(27B)...O(17) <sup>#3</sup> | 3.029(15)                         | C(27)-H(27B)-O(17) <sup>#3</sup> | 117                            |

|                                     |           |                                   |        |
|-------------------------------------|-----------|-----------------------------------|--------|
| C(41)-H(41B)···O(2W) <sup>#4</sup>  | 3.119(15) | C(41)-H(41B)-O(2W) <sup>#4</sup>  | 122    |
| C(44)-H(44A)···O(13) <sup>#5</sup>  | 3.296(10) | C(44)-H(44A)-O(13) <sup>#5</sup>  | 143    |
| C(51)-H(51A)···O(21) <sup>#6</sup>  | 3.338(19) | C(51)-H(51A)-O(21) <sup>#6</sup>  | 142    |
| C(53)-H(53A)···O(26) <sup>#6</sup>  | 3.40(3)   | C(53)-H(53A)-O(26) <sup>#6</sup>  | 142    |
| C(54)-H(54A)···O(17) <sup>#6</sup>  | 3.256(18) | C(54)-H(54A)-O(17) <sup>#6</sup>  | 133    |
| C(57)-H(57B)···O(18) <sup>#5</sup>  | 3.34(2)   | C(57)-H(57B)-O(18) <sup>#5</sup>  | 155    |
| C(59)-H(59A)···O(25) <sup>#7</sup>  | 3.361(17) | C(59)-H(59A)-O(25) <sup>#7</sup>  | 165    |
| C(59)-H(59B)···O(5) <sup>#3</sup>   | 3.247(8)  | C(59)-H(59B)-O(5) <sup>#3</sup>   | 147    |
| <b>2</b>                            |           |                                   |        |
| C(5)-H(5B)···O(6)                   | 3.406(11) | C(5)-H(5B)-O(6)                   | 165    |
| C(12)-H(12A)···O(6) <sup>#8</sup>   | 3.406(15) | C(12)-H(12A)-O(6) <sup>#8</sup>   | 147    |
| C(12)-H(12C)···O(4) <sup>#9</sup>   | 3.383(16) | C(12)-H(12C)-O(4) <sup>#9</sup>   | 156    |
| <b>3</b>                            |           |                                   |        |
| C(6)-H(3)···O(33)                   | 3.39(3)   | C(6)-H(3)-O(33)                   | 155    |
| C(32)-H(9)···O(22) <sup>#10</sup>   | 3.53(2)   | C(32)-H(9)-O(22) <sup>#10</sup>   | 173    |
| C(33)-H(10)···O(31) <sup>#10</sup>  | 3.16(4)   | C(33)-H(10)-O(31) <sup>#10</sup>  | 158    |
| C(233)-H(31)···O(15) <sup>#11</sup> | 3.50(4)   | C(233)-H(31)-O(15) <sup>#11</sup> | 165    |
| <b>4</b>                            |           |                                   |        |
| O1W-H1WA···N3 <sup>#12</sup>        | 2.871(5)  | O1W-H1WA-N3 <sup>#12</sup>        | 160(4) |
| O1W-H1WB···O4                       | 2.935(6)  | O1W-H1WB-O4                       | 164(3) |
| C4-H4A···O1W <sup>#12</sup>         | 3.315(6)  | C4-H4A-O1W <sup>#12</sup>         | 162    |
| C12-H12A···O6 <sup>#13</sup>        | 3.369(7)  | C12-H12A-O6 <sup>#13</sup>        | 143    |
| C14-H14A···O6 <sup>#14</sup>        | 3.338(7)  | C14-H14A-O6 <sup>#14</sup>        | 137    |
| C14-H14B···O5 <sup>#15</sup>        | 3.433(8)  | C14-H14B-O5 <sup>#15</sup>        | 164    |
| C17-H17A···O1W <sup>#16</sup>       | 3.251(7)  | C17-H17A-O1W <sup>#16</sup>       | 163(3) |
| <b>5</b>                            |           |                                   |        |
| C(6)-H(6A)···Br(2)                  | 3.712(7)  | C(6)-H(6A)-Br(2)                  | 157    |
| <b>6</b>                            |           |                                   |        |
| C(6)-H(6A)···Br(4)                  | 3.740(11) | C(6)-H(6A)-Br(4)                  | 165    |
| C(12)-H(12B)···Br(4) <sup>#17</sup> | 3.617(14) | C(12)-H(12B)-Br(4) <sup>#17</sup> | 132    |
| C(14)-H(14B)···Br(4) <sup>#18</sup> | 3.842(11) | C(14)-H(14B)-Br(4) <sup>#18</sup> | 165    |

<sup>a</sup> Symmetry transformations are used to generate equivalent atoms: #1 2-x, 1-y, 1-z; #2 1-x, 2-y, 1-z; #3 1-x, 1-y, 1-z; #4 1-x, -1-y, 1-z; #5 1-x, -y, 1-z; #6 -x, 1-y, 1-z; #7 x, -1+y, z; #8

-1/3+x, -2/3+x-y, -1/6+z; #9 1/3-y, -1/3+x-y, -1/3+z; #10 -x, -1/2+y, 1-z; #11 1/2-x, 1/2-y, z;  
#12 1-x, 1-y, -z; #13 -1+x, y, -1+z; #14 -1+x, 1+y, z; #15 x, 1+y, z; #16 2-x, 1-y, 1-z; #17  
3/2-x, -y, z; #18 x, 1/2-y, 1/2-z.

<sup>b</sup>D: donor; A: acceptor.
